# Supplementary material
Source: PubMed Central journal article supplement (PMC7286562)
Supplement: NIHMS1587448-supplement-3.pdf [file NIHMS1587448-supplement-3.pdf]

Supporting information for “Topological portraits of multiscale coordination dynamics” by Mengsen Zhang, William D. Kalies, J. A. Scott Kelso, and Emmanuelle Tognoli

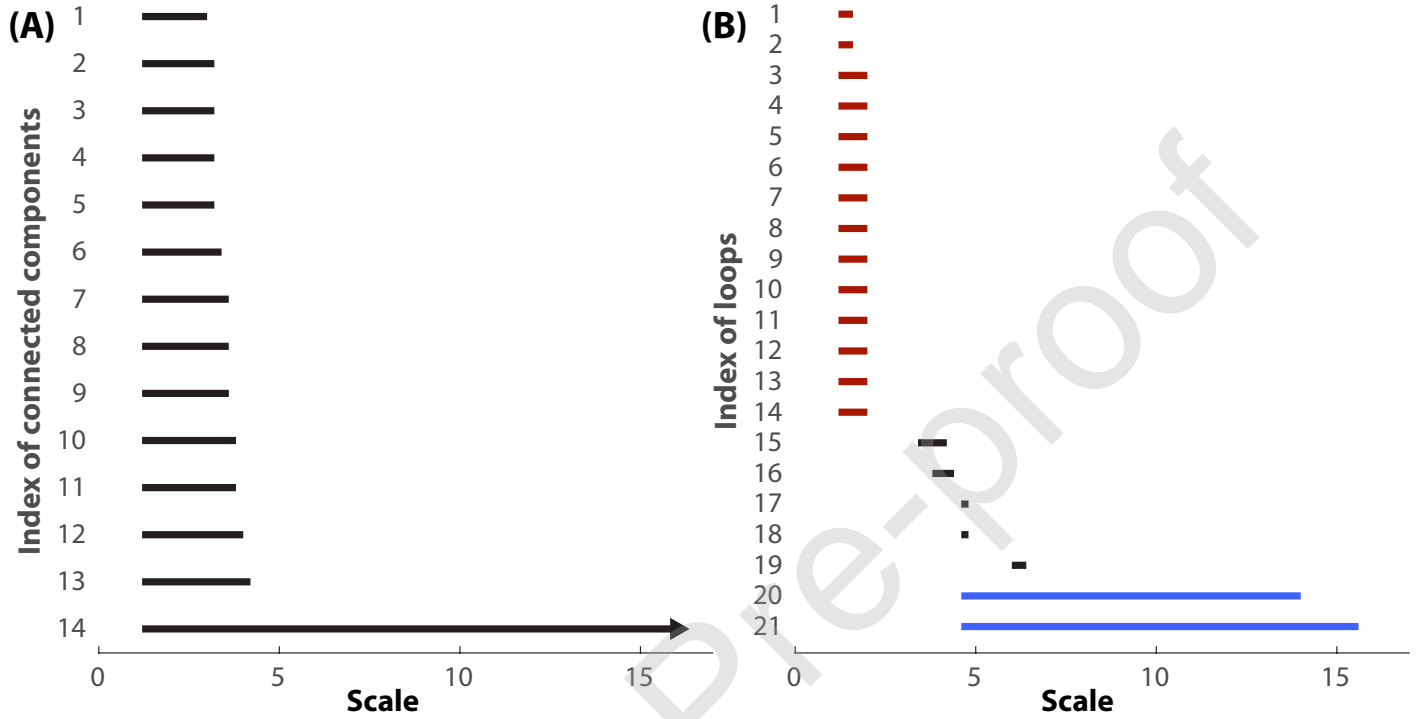

**Fig S1. Persistent homology of a big letter B of many small letter A's shown as barcodes.** The 0<sup>th</sup> and 1<sup>st</sup> persistent homology characterize the scale-dependency of connected components (A) and loops (B) respectively, computed from an image of a big letter B of many small letter A's (Fig 4 left box; the image used for computation has  $61 \times 100$  pixels). In (A), each bar represents a particular connected component, whose left end indicates at which scale this connected component emerges, and the right end at which scale it disappears (by merging into a larger component). There are clearly 14 connected components at finer scales (scale, i.e. radius of the disk centered at each pixel, below 5) and 1 at grosser scales (right arrow in bar 14 indicates that this component never disappears with increasing scale). In (B), each bar represents a loop. There are clearly 14 loops at finer scales (below 3; red bars) and two major loops at grosser scales (blue bars; some more transient features also appear in the transition between the 14-loop and the 2-loop configuration, which are also features emerged during scaling of the image; colors are only for highlights, not computed). Together, these two multiscale topological portraits (A-B) faithfully capture the coexistence of two descriptions of the image (many A's or one B) and their separation in scale.

**S1 Text Simulations of metastable coordination** Examples of metastable dynamics shown in Fig 5 are simulated following the equation

$$\dot{\varphi}_i = \omega_i - a \sum_{j=1}^N \sin(\varphi_i - \varphi_j) - b \sum_{j=1}^N \sin 2(\varphi_i - \varphi_j) \quad (\text{S1})$$

where  $\varphi_i$ ,  $\dot{\varphi}_i$ , and  $\omega_i$  are the phase, the time derivative of phase, and the natural frequency of the  $i^{\text{th}}$  oscillator in an ensemble of  $N$ , respectively, and  $a, b \geq 0$  are the

first-order and second-order coupling strengths between oscillators. This system [65] has been shown to capture key experimental observations of coordination between multiple people as observed in [66]. For the example shown in Fig 5 A-B,  $\omega_{1,2} = 0, 0.6$  Hz and  $a = b = 1$  with zero initial phases. For the example shown in Fig 5 C-D, the average natural frequency  $\bar{\omega} = 1.5$  Hz, the natural frequency difference between two adjacent oscillators  $\omega_{i+1} - \omega_i = 0.075$  Hz, and overall coupling strength  $a = b = 0.15$  with random initial conditions.

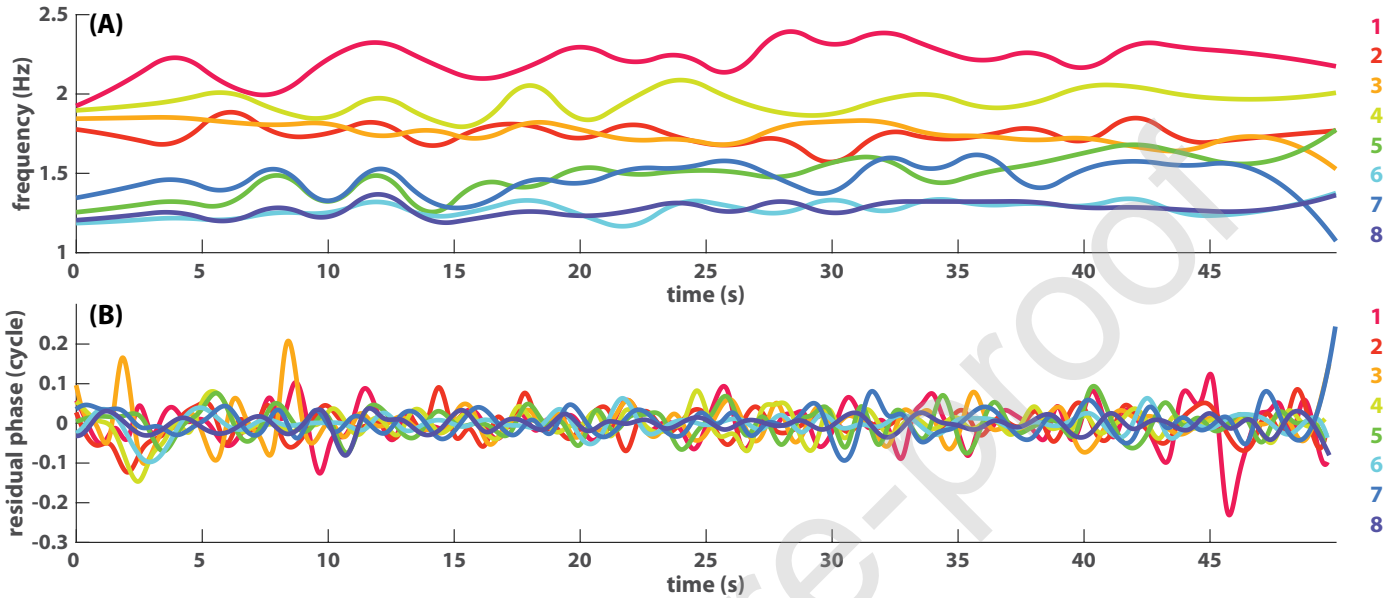

**Fig S2. Decomposition of absolute phase dynamics for the eight-agent example (Fig 2).** The absolute phase of each agent is decomposed into to a slowly varying frequency component (A) and a fast varying residual phase (B).
